# Supplementary material for: Catalytic mTOR inhibitors can overcome intrinsic and acquired resistance to allosteric mTOR inhibitors
Source: PubMed Central journal article supplement (PMC4226703; doi:10.18632/oncotarget.2337), 2014-08-10
Supplement: oncotarget-05-8544-s001.pdf [file oncotarget-05-8544-s001.pdf]

# Catalytic mTOR inhibitors can overcome intrinsic and acquired resistance to allosteric mTOR inhibitors

## Supplementary Material

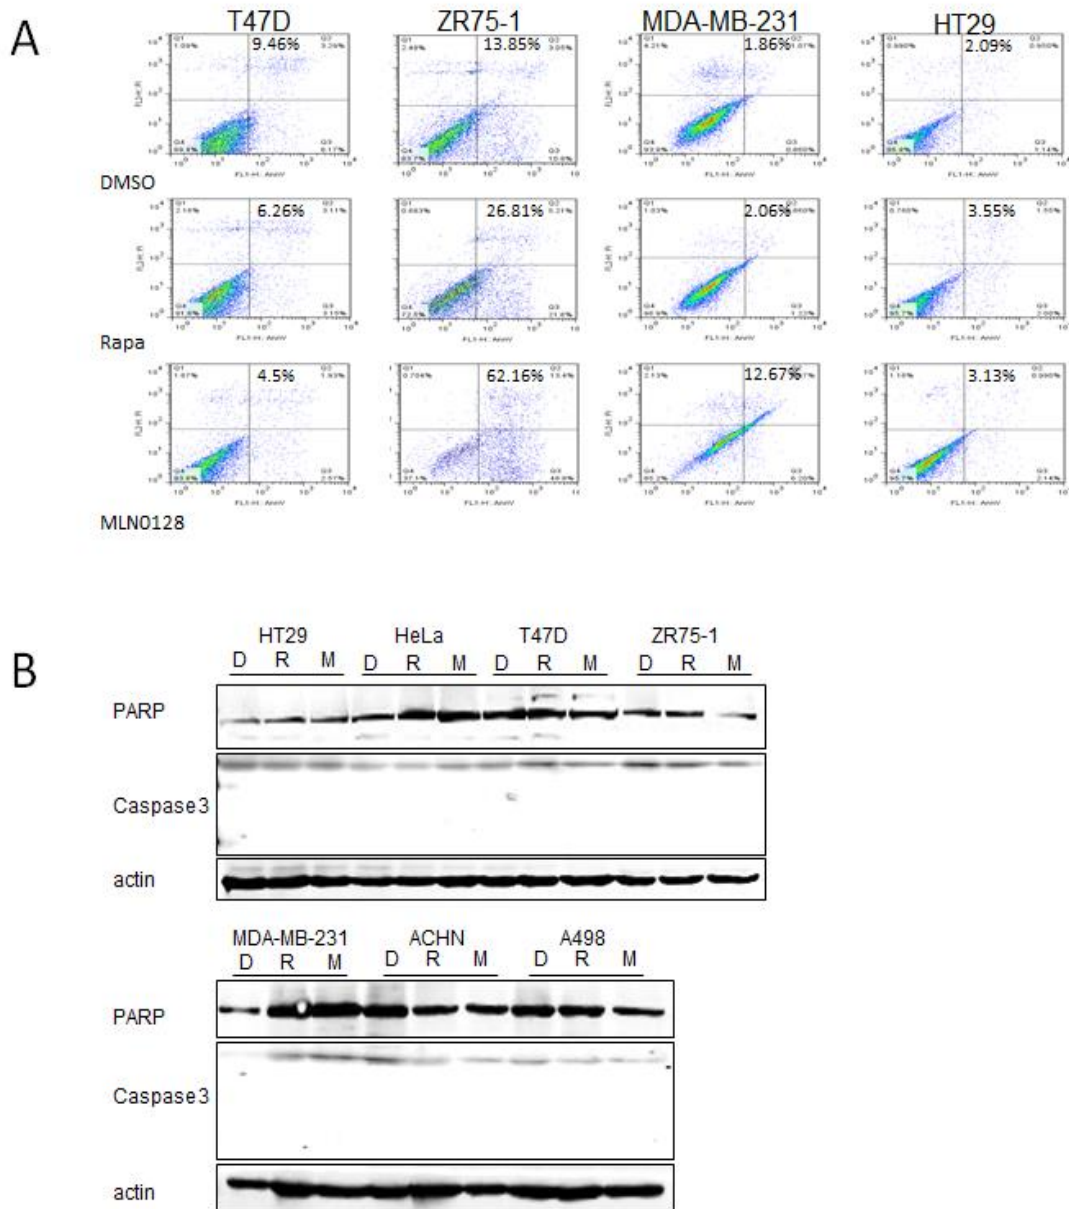

**Supplementary Figure 1:** (A) Percentages of annexin V positive cells. (B) Immunoblotting for apoptosis in cell lines.

Supplementary Table 1: Selected molecular characteristics of cell line panel.

| Cell line   | Tissue | ER       | PR       | HER2     | Mutations                      |
|-------------|--------|----------|----------|----------|--------------------------------|
| A498        | Kidney |          |          |          | CDKN2A, SETD2, VHL             |
| ACHN        | Kidney |          |          |          | CDKN2A, NF2                    |
| BT474       | Breast | Positive | Positive | Positive | PIK3CA, TP53                   |
| HCC70       | Breast | Positive | Negative | Negative | PTEN, TP53                     |
| HCC1428     | Breast | Positive | Positive | Negative |                                |
| HCC1806     | Breast | Negative | Negative | Negative | CDKN2A, KDM6A, STK11, TP53     |
| HT29        | Colon  |          |          |          | APC, BRAF, PIK3CA, SMAD4, TP53 |
| M14         | Skin   |          |          |          | BRAF, CDKN2A, TP53             |
| MCF7        | Breast | Positive | Positive | Negative | CDKN2A, PIK3CA                 |
| MDA-MB-231  | Breast | Negative | Negative | Negative | BRAF, CDKN2A, KRAS, NF2, TP53  |
| MDA-MB-361  | Breast | Positive | Positive | Positive | CDKN2A, PIK3CA                 |
| MDA-MB-435  | Breast | Negative | Negative | Negative | FLT1, FLT4, IGF1R, PDK1        |
| MDA-MB-468  | Breast | Negative | Negative | Negative | PTEN, RB1, SMAD4, TP53         |
| NCI/ADR-RES | Ovary  |          |          |          | ERBB2, TP53                    |
| T47D        | Breast | Positive | Positive | Negative | PIK3CA, TP53                   |
| ZR75-1      | Breast | Positive | Negative | Negative | PTEN                           |

References:

1. Stemke-Hale K, Gonzalez-Angulo AM, Lluch A, Neve RM, Kuo WL, Davies M, et al. An integrative genomic and proteomic analysis of PIK3CA, PTEN, and AKT mutations in breast cancer. *Cancer Res.* 2008;68:6084-91.
2. Forbes SA, Bindal N, Bamford S, Cole C, Kok CY, Beare D, et al. COSMIC: mining complete cancer genomes in the Catalogue of Somatic Mutations in Cancer. *Nucleic Acids Res.* 2011;39:D945-50.2.

Supplementary Table 2: List of genes assessed by targeted exome sequencing

| Symbol   | Chromosome region            | Name                                                                        |
|----------|------------------------------|-----------------------------------------------------------------------------|
| ABL1     | chr9:133,710,831-133,763,060 | c-abl oncogene 1, non-receptor tyrosine kinase                              |
| ACVR1B   | chr12:52345486-52390859      | activin A receptor, type IB                                                 |
| ADAMTS12 | chr5:33,527,287-33,892,124   | ADAM metalloproteinase with thrombospondin type 1 motif, 12                 |
| AKAP3    | chr12:4,724,677-4,754,358    | A kinase (PRKA) anchor protein 3                                            |
| AKT1     | chr14:105235689-105262080    | v-akt murine thymoma viral oncogene homolog 1                               |
| ALK      | chr2:29415641-30144432       | anaplastic lymphoma kinase (Ki-1)                                           |
| APC      | chr5:112073556-112181935     | adenomatous polyposis of the colon gene                                     |
| AR       | chrX:66763874-66944119       | androgen receptor                                                           |
| ARAF     | chrX:47420578-47431319       | v-raf murine sarcoma 3611 viral oncogene homolog                            |
| ARID1A   | chr1:27022522-27108601       | AT rich interactive domain 1A (SWI-like)                                    |
| ASXL1    | chr20:30946153-31027121      | additional sex combs like 1                                                 |
| ATM      | chr11:108093559-108239826    | ataxia telangiectasia mutated                                               |
| ATR      | chr3:142168078-142297668     | ataxia telangiectasia and Rad3 related                                      |
| ATRX     | chrX:76760359-77041719       | alpha thalassemia/mental retardation syndrome X-linked                      |
| AURKA    | chr20:54944445-54967351      | aurora kinase A                                                             |
| AURKB    | chr17:8108050-8113883        | aurora kinase B                                                             |
| BAI3     | chr6:69345632-70099402       | brain-specific angiogenesis inhibitor 3                                     |
| BAP1     | chr3:52435027-52444009       | BRCA1 associated protein-1 (ubiquitin carboxy-terminal hydrolase)           |
| BRAF     | chr7:140433815-140624564     | v-raf murine sarcoma viral oncogene homolog B1                              |
| BRCA1    | chr17:41196313-41277500      | familial breast/ovarian cancer gene 1                                       |
| BRCA2    | chr13:32889617-32973809      | familial breast/ovarian cancer gene 2                                       |
| CARD11   | chr7:2945769-3083579         | caspace recruitment domain family, member 11                                |
| CASP8    | chr2:202122754-202152434     | caspace 8, apoptosis-related cysteine peptidase                             |
| CBL      | chr11:119076990-119178858    | Cas-Br-M (murine) ecotropic retroviral transforming sequence                |
| CD19     | chr16:28943260-28950661      | CD19 molecule                                                               |
| CDH1     | chr16:68771195-68869444      | cadherin 1, type 1, E-cadherin (epithelial) (ECAD)                          |
| CDH10    | chr5:24487210-24644911       | cadherin 10, type 2                                                         |
| CDH11    | chr16:64980685-65155919      | cyclin-dependent kinase 11                                                  |
| CDK4     | chr12:58142005-58146164      | cyclin-dependent kinase 4                                                   |
| CDK6     | chr7:92234237-92465941       | cyclin-dependent kinase 6                                                   |
| CDKN2A   | chr9:21967752-21994490       | cyclin-dependent kinase inhibitor 2A (p16(INK4a)) gene                      |
| CEBPA    | chr19:33790842-33793430      | CCAAT/enhancer binding protein (C/EBP), alpha                               |
| CHEK1    | chr11:125496312-125525639    | CHK1 checkpoint homolog (S. pombe)                                          |
| CHEK2    | chr22:29083731-29137822      | CHK2 checkpoint homolog                                                     |
| COL14A1  | chr8:121137352-121384266     | collagen, type XIV, alpha 1                                                 |
| CPAMD8   | chr19:17003763-17137625      | C3 and PZP-like, alpha-2-macroglobulin domain containing 8                  |
| CREBBP   | chr16:3775058-3930121        | CREB binding protein (CBP)                                                  |
| CRIPAK   | chr4:1385340-1389782         | cysteine-rich PAK1 inhibitor                                                |
| CSF1R    | chr5:149432855-149492935     | colony stimulating factor 1 receptor                                        |
| CSMD1    | chr8:2792876-4852328         | CUB and Sushi multiple domain 1                                             |
| CSMD2    | chr1:33979609-34630875       | CUB and Sushi multiple domains 2                                            |
| CSMD3    | chr8:113235161-114449242     | CUB and Sushi multiple domain 3                                             |
| CTNNB1   | chr3:41240942-41281939       | catenin (cadherin-associated protein), beta 1                               |
| CYLD     | chr16:50775961-50835846      | familial cylindromatosis gene                                               |
| CYP2C19  | chr10:96522463-96612670      | cytochrome P450, family 2, subfamily C, polypeptide 19                      |
| DAXX     | chr6:33,286,336-33,290,793   | death-domain associated protein                                             |
| DDR1     | chr6:30856465-30867931       | discoidin domain receptor tyrosine kinase 1                                 |
| DDR2     | chr1:162602228-162750237     | discoidin domain receptor tyrosine kinase 2                                 |
| DNMT3A   | chr2:25455846-25564774       | DNA (cytosine-5-)-methyltransferase 3 alpha                                 |
| EGFR     | chr7:55086725-55275030       | epidermal growth factor receptor                                            |
| ELN      | chr7:73442427-73484234       | elastin                                                                     |
| EML4     | chr2:42,396,490-42,559,686   | echinoderm microtubule associated protein like 4                            |
| EP300    | chr22:41488614-41576080      | 300 kd E1A-Binding protein gene                                             |
| EPHA3    | chr3:89156674-89531282       | EPH receptor A3                                                             |
| ERBB2    | chr17:37856254-37884914      | v-erb-b2 erythroblastic leukemia viral oncogene homolog 2                   |
| ERBB3    | chr12:56,473,892-56,497,127  | v-erb-b2 erythroblastic leukemia viral oncogene homolog 3 (avian)           |
| ERCC3    | chr2:128014866-128051752     | excision repair cross-complementing rodent repair deficiency, compl group 3 |
| ERCC4    | chr16:14014014-14046205      | excision repair cross-complementing rodent repair deficiency, compl group 4 |
| ERCC5    | chr13:103459496-103524748    | excision repair cross-complementing rodent repair deficiency, comp group 6  |
| ESR1     | chr6:152163859-152424408     | estrogen Receptor 1                                                         |
| ETV5     | chr3:185764108-185826901     | ets variant 5                                                               |
| EZH2     | chr7:148504475-148581414     | cer of zeste homolog 2 (Drosophila)                                         |
| FAM123B  | chrX:63404998-63425624       | family with sequence similarity 123B (FAM123B)                              |
| FAM135B  | chr8:139142268-139509065     | family with sequence similarity 135, member B                               |
| FAT3     | chr11:92,085,262-92,629,633  | fat tumor suppressor 3                                                      |
| FBXW7    | chr4:153242411-153456185     | F-box and WD-40 domain protein 7 (archipelago homolog, Drosophila)          |

|          |                              |                                                                                 |
|----------|------------------------------|---------------------------------------------------------------------------------|
| FGFR1    | chr8:38268657-38326352       | FGFR1 oncogene partner (FOP)                                                    |
| FGFR2    | chr10:123237845-123357972    | fibroblast growth factor receptor 2                                             |
| FGFR3    | chr4:1795039-1810599         | fibroblast growth factor receptor 3                                             |
| FGFR4    | chr5:176513921-176525124     | fibroblast growth factor receptor 4                                             |
| FLG      | chr1:152274651-152297679     | filaggrin                                                                       |
| FLT1     | chr13:28874483-29069265      | fms-related tyrosine kinase 1 (VEGF/vascular permeability factor receptor)      |
| FLT3     | chr13:28577412-28674729      | fms-related tyrosine kinase 3                                                   |
| FLT4     | chr5:180028507-180076624     | fms-related tyrosine kinase 4                                                   |
| FOXL2    | chr3:138,663,067-138,665,982 | forkhead box L2                                                                 |
| GABRA6   | chr5:161112658-161129598     | GABA A receptor, alpha 6                                                        |
| GABRB3   | chr15:26788695-27018251      | GABA A1 receptor, beta 3                                                        |
| GATA1    | chrX:48,644,982-48,652,715   | GATA binding protein 3                                                          |
| GATA3    | chr10:8096667-8117162        | guanine monphosphate synthetase                                                 |
| GNAI1    | chr19:3094408-3121452        | guanine nucleotide binding protein (G protein), alpha 11 (Gq class)             |
| GNAQ     | chr9:80335200-80646192       | guanine nucleotide binding protein (G protein), q polypeptide                   |
| GNAS     | chr20:57414795-57486249      | guanine nucleotide binding protein (G protein), alpha stimulating activ polyp 1 |
| HDAC9    | chr7:18535885-19036984       | histone deacetylase 9                                                           |
| HEATR7B2 | chr5:40998123-41071444       | HEAT repeat family member 7B2                                                   |
| HGF      | chr7:81331445-81399452       | hepatocyte growth factor                                                        |
| HMCN1    | chr1:185703683-186160085     | hemicentin 1                                                                    |
| HNF1A    | chr12:121416549-121440312    | transcription factor 1, hepatic (HNF1)                                          |
| HNF1B    | chr17:36046435-36105096      | HNF1 homeobox B                                                                 |
| HRAS     | chr11:532243-535550          | v-Ha-ras Harvey rat sarcoma viral oncogene homolog                              |
| HYDIN    | chr16:70841290-71264569      | hydrocephalus inducing homolog                                                  |
| IDH1     | chr2:209100954-209119806     | isocitrate dehydrogenase 1 (NADP+), soluble                                     |
| IDH2     | chr15:90627214-90645708      | isocitrate dehydrogenase 2 (NADP+), soluble                                     |
| IGF1R    | chr15:99192761-99507758      | insulin-like growth factor 1 receptor                                           |
| IKZF1    | chr7:50344378-50472796       | interleukin 21 receptor                                                         |
| IL6R     | chr1:154377669-154440188     | interleukin 6 receptor                                                          |
| IRS1     | chr2:227596034-227663506     | insulin receptor substrate 1                                                    |
| ITGA4    | chr2:182321619-182402466     | integrin alpha 4 (antigen CD49D subunit of VLA-4 receptor)                      |
| JAK1     | chr1:65298906-65432187       | Janus kinase 1                                                                  |
| JAK2     | chr9:4985245-5128182         | Janus kinase 3                                                                  |
| JAK3     | chr19:17935595-17958841      | Janus kinase 3                                                                  |
| KCNB2    | chr8:73449626-73850582       | potassium voltage-gated channel, Shab-related subfamily, member 2               |
| KDM6A    | chrX:44732423-44971843       | vascular endothelial growth factor receptor 2                                   |
| KDR      | chr4:55944427-55991762       | vascular endothelial growth factor receptor 2                                   |
| KIT      | chr4:55524095-55606879       | kallikrein-related peptidase 2                                                  |
| KRAS     | chr12:25358180-25403854      | v-Ki-ras2 Kirsten rat sarcoma 2 viral oncogene homolog                          |
| LAMA1    | chr18:6941888-7117813        | laminin, alpha 1                                                                |
| LPHN3    | chr4:62362839-62938167       | latrophilin 3                                                                   |
| LRP1     | chr12:57,522,282-57,607,123  | low density lipoprotein receptor-related protein 1B                             |
| LRP1B    | chr2:140988996-142889270     | low density lipoprotein receptor-related protein 2                              |
| LRP2     | chr2:169983620-170219122     | low density lipoprotein receptor-related protein 3                              |
| MAP2K1   | chr15:66679211-66783881      | mitogen-activated protein kinase kinase 1                                       |
| MAP2K4   | chr17:11924135-12047050      | mitogen-activated protein kinase kinase 4                                       |
| MAP3K1   | chr5:56110900-56191976       | mitogen-activated protein kinase kinase kinase 1                                |
| MAP3K4   | chr6:161412822-161538416     | mitogen-activated protein kinase kinase kinase 4                                |
| MDN1     | chr6:90353231-90529442       | MDN1, midasin homolog                                                           |
| MECOM    | chr3:168801287-169381563     | MDS1 and EVI1 complex locus                                                     |
| MEN1     | chr11:64570996-64578188      | multiple endocrine neoplasia type 1 gene                                        |
| MET      | chr7:116312459-116438439     | met proto-oncogene (hepatocyte growth factor receptor)                          |
| MITF     | chr3:69788633-70017486       | microphthalmia-associated transcription factor                                  |
| MLH1     | chr3:37034979-37092335       | E.coli MutL homolog gene                                                        |
| MLL2     | chr12:49412762-49449107      | myeloid/lymphoid or mixed-lineage leukemia 2                                    |
| MLL3     | chr7:151832012-152133090     | myeloid/lymphoid or mixed-lineage leukemia 3                                    |
| MPL      | chr1:43803475-43820134       | myeloproliferative leukemia virus oncogene                                      |
| MSH2     | chr2:47630263-47710360       | mutS homolog 2 (E. coli)                                                        |
| MSH6     | chr2:48,010,221-48,034,084   | mutS homolog 6 (E. coli)                                                        |
| MTOR     | chr1:11166589-11322608       | mammalian target of rapamycin complex 1                                         |
| MYD88    | chr3:38179969-38184510       | myeloid differentiation primary response gene (88)                              |
| NAV3     | chr12:78225069-78606788      | neuron navigator 3                                                              |
| NCOR1    | chr17:15935259-16118845      | nuclear receptor corepressor 1                                                  |
| NF1      | chr17:29,421,995-29,704,694  | neurofibromatosis type 1 gene                                                   |
| NF2      | chr22:29999545-30094583      | neurofibromatosis type 2 gene                                                   |
| NFKB2    | chr10:104154339-104162280    | nuclear factor of kappa light polypeptide gene enhancer in B-cells 2            |
| NOTCH1   | chr9:139388897-139440238     | Notch homolog 1, translocation-associated (Drosophila) (TAN1)                   |
| NOTCH2   | chr1:120454178-120612276     | Notch homolog 2                                                                 |
| NOTCH3   | chr19:15270445-15311792      | notch 3                                                                         |
| NOTCH4   | chr6:32162621-32191844       | notch4                                                                          |
| NPM1     | chr5:170814798-170837887     | nucleophosmin (nucleolar phosphoprotein B23, numatrin)                          |

|         |                            |                                                                              |
|---------|----------------------------|------------------------------------------------------------------------------|
| NRAS    | chr1:115247079-115259515   | neuroblastoma RAS viral (v-ras) oncogene homolog                             |
| NSD1    | chr5:176560833-176727213   | nuclear receptor binding SET domain protein 1                                |
| PALB2   | chr16:23614483-23652678    | partner and localizer of BRCA2                                               |
| PAPPA2  | chr1:176432307-176811968   | pappalysin 2                                                                 |
| PAX5    | chr9:36838531-37034476     | paired box gene 5 (B-cell lineage specific activator protein)                |
| PBRM1   | chr3:52,579,368-52,713,739 | polybromo 1                                                                  |
| PCDH15  | chr10:55580860-56561051    | protocadherin 1                                                              |
| PCLO    | chr7:82383321-82792197     | piccolo (presynaptic cytomatrix protein)                                     |
| PDGFRA  | chr4:55095264-55164411     | platelet-derived growth factor, alpha-receptor                               |
| PDGFRB  | chr5:149493403-149535422   | platelet-derived growth factor receptor, beta polypeptide                    |
| PIK3CA  | chr3:17886631-178952495    | phosphoinositide-3-kinase, catalytic, alpha polypeptide                      |
| PIK3CG  | chr7:106505924-106547585   | phosphoinositide-3-kinase, catalytic, gamma polypeptide                      |
| PIK3R1  | chr5:67522118-67597647     | phosphoinositide-3-kinase, regulatory subunit 1 (alpha)                      |
| PIKFYVE | chr2:209130991-209223474   | protein phosphatase 2A activator, regulatory subunit 4                       |
| PKHD1   | chr6:51480145-51952423     | polycystic kidney and hepatic disease 1 (autosomal recessive)                |
| PKHD1L1 | chr8:110374706-110543499   | polycystic kidney and hepatic disease 1 (autosomal recessive)-like 1         |
| PPP1R3A | chr7:113516882-113559082   | protein phosphatase 1, regulatory (inhibitor) subunit 3A                     |
| PPP2R1A | chr19:52693191-52729670    | protein phosphatase 2, regulatory subunit A, alpha                           |
| PPP2R4  | chr9:131873244-131911223   | protein phosphatase 2A activator, regulatory subunit 4                       |
| PRDM1   | chr6:106534195-106557814   | PR domain containing 1, with ZNF domain                                      |
| PRSS1   | chr7:142457319-142460927   | protease, serine, 1 (trypsin 1)                                              |
| PTCH1   | chr9:98205266-98270831     | Homolog of Drosophila Patched gene1                                          |
| PTEN    | chr10:89623195-89728531    | phosphatase and tensin homolog gene                                          |
| PTK2    | chr8:141668502-142011332   | PTK2 protein tyrosine kinase 2                                               |
| PTPN11  | chr12:112856536-112947716  | protein tyrosine phosphatase, non-receptor type 11                           |
| RAD51   | chr15:40987327-41024354    | RAD51 homolog                                                                |
| RAF1    | chr3:12625102-12705700     | v-raf-1 murine leukemia viral oncogene homolog 1                             |
| RB1     | chr13:48877883-49056024    | retinoblastoma gene                                                          |
| RELN    | chr7:103112233-103629963   | reelin                                                                       |
| RET     | chr10:43572517-43625795    | ret proto-oncogene                                                           |
| RIMS2   | chr8:104512976-105265451   | regulating synaptic membrane exocytosis 2                                    |
| RNF213  | chr17:78313726-78370078    | ring finger protein 213                                                      |
| RUNX1   | chr21:36160099-36421595    | runt-related transcription factor 1 (AML1)                                   |
| RUNX1T1 | chr8:92971152-93088365     | runt-related transcription factor 1                                          |
| RYR2    | chr1:237205702-237997288   | regulatory factor X, 2 (influences HLA class II expression)                  |
| SETD2   | chr3:47057900-47205467     | SET domain containing 2                                                      |
| SMAD4   | chr18:48556583-48611409    | SMAD family member 4                                                         |
| SMARCA4 | chr19:11071598-11172959    | SWI/SNF related, matrix assoc, actin dep reg of chrom, subfamily a, member 4 |
| SMARCB1 | chr22:24129150-24176704    | SWI/SNF related, matrix assoc, actin dep reg of chrom, subfamily b, member 1 |
| SMO     | chr7:128828713-128853383   | smoothened homolog (Drosophila)                                              |
| SOS1    | chr2:39208692-39347604     | son of sevenless homolog 1                                                   |
| SPEN    | chr1:16174359-16266950     | spen homolog, transcriptional regulator                                      |
| SPOP    | chr17:47676248-47755525    | speckle-type POZ protein                                                     |
| SPTA1   | chr1:158580496-158656506   | spectrin alpha, erythrocytic 1                                               |
| STK11   | chr19:1205798-1228434      | serine/threonine kinase 11 gene (LKB1)                                       |
| SYK     | chr9:93564012-93660833     | spleen tyrosine kinase                                                       |
| SYNE1   | chr6:152442823-152958534   | spectrin repeat containing, nuclear envelope 1                               |
| SYNE2   | chr14:64319683-64693165    | spectrin repeat containing, nuclear envelope 2                               |
| TBC1D4  | chr13:75858809-76056250    | TBC1 domain family, member 4                                                 |
| TET2    | chr4:106067943-106200958   | tet oncogene family member 2                                                 |
| TGFB1   | chr19:41836651-41859816    | transforming growth factor, beta 1                                           |
| TGFBR2  | chr3:30647994-30735631     | transforming growth factor, beta receptor II                                 |
| TNFAIP3 | chr6:138188581-138204445   | tumor necrosis factor, alpha-induced protein 3                               |
| TOP1    | chr20:39657462-39753124    | topoisomerase (DNA) I                                                        |
| TOP2A   | chr17:38544798-38574169    | topoisomerase II                                                             |
| TP53    | chr17:7571720-7590863      | tumor protein p53                                                            |
| TSC1    | chr9:135766735-135820020   | tuberous sclerosis 1                                                         |
| TSC2    | chr16:2097990-2138712      | tuberous sclerosis 2                                                         |
| TSHR    | chr14:81421869-81612646    | thyroid stimulating hormone receptor                                         |
| USH2A   | chr1:215796236-216596738   | usher syndrome 2A                                                            |
| VHL     | chr3:10183319-10193744     | von Hippel-Lindau syndrome gene                                              |
| WHSC1   | chr4:1873123-1983933       | Wolf-Hirschhorn syndrome candidate 1                                         |
| WT1     | chr11:32409325-32457087    | Wilms tumour 1 gene                                                          |
| ZNF238  | chr1:244214561-244220776   | zinc finger protein 238                                                      |
| ZNF536  | chr19:30863328-31048965    | zinc finger protein 536                                                      |
